# Supplementary material
Source: PubMed Central journal article supplement (PMC4787968)

Supplementary Appendix  
Sensitivity analysis

**Primary outcome**

1. All-cause mortality

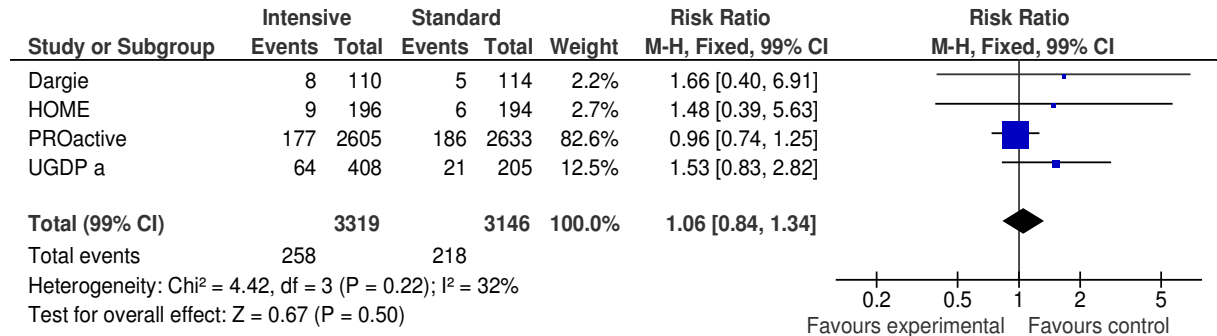

2. Cardiovascular deaths

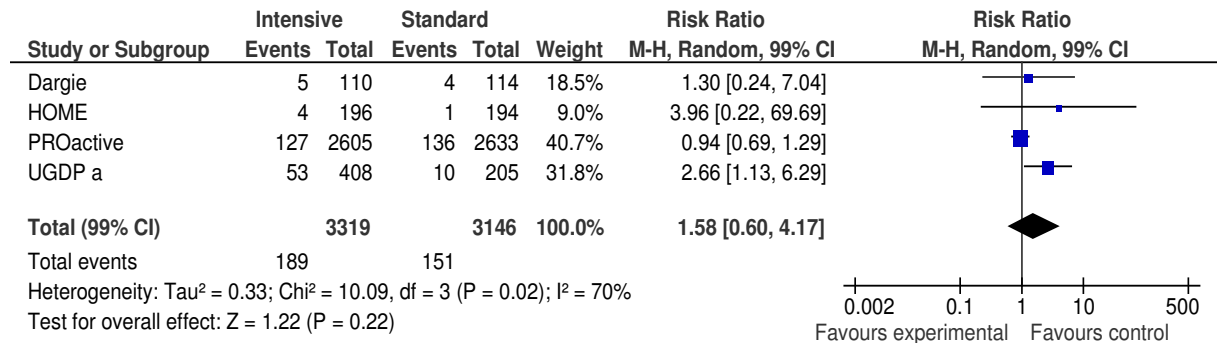

## Macro-vascular events

### 1. All myocardial infarctions

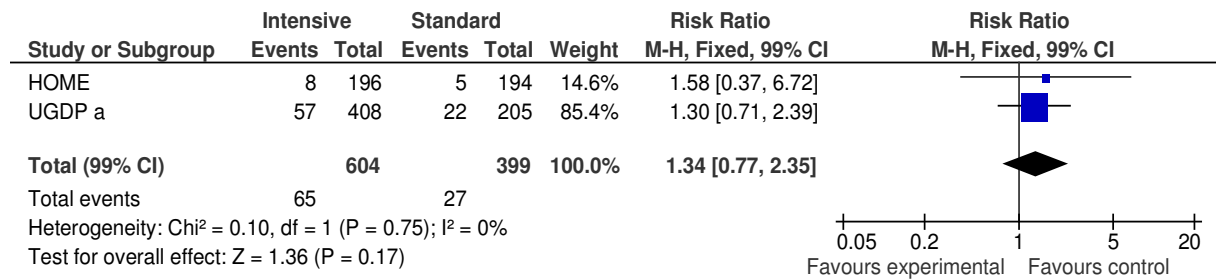

### 2. Non-fatal myocardial infarctions

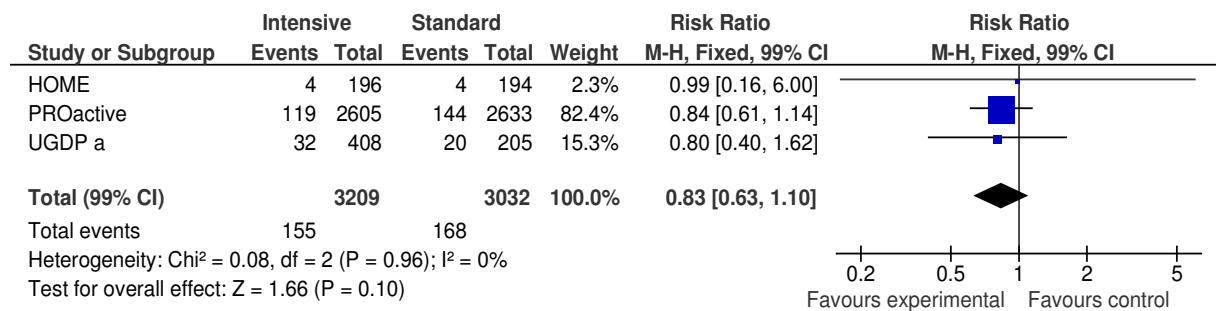

### 3. All strokes

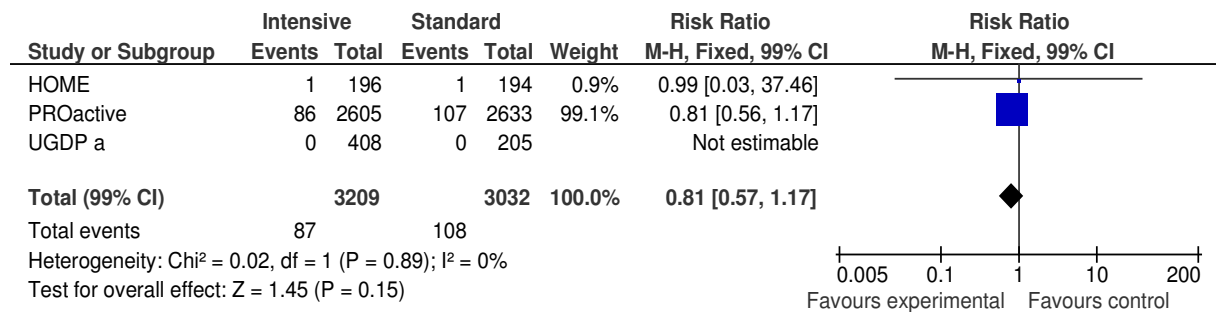

### 4. Congestive Heart Failure

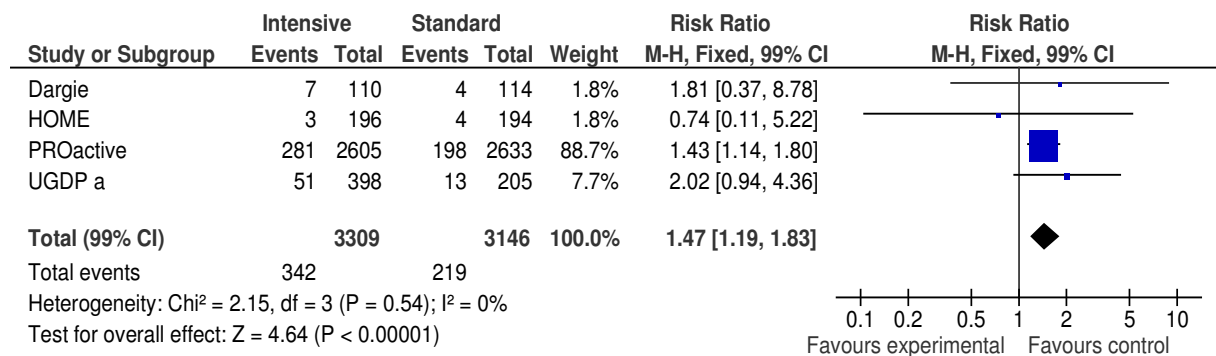

## Micro-vascular events

### 1. New or worsening retinopathy

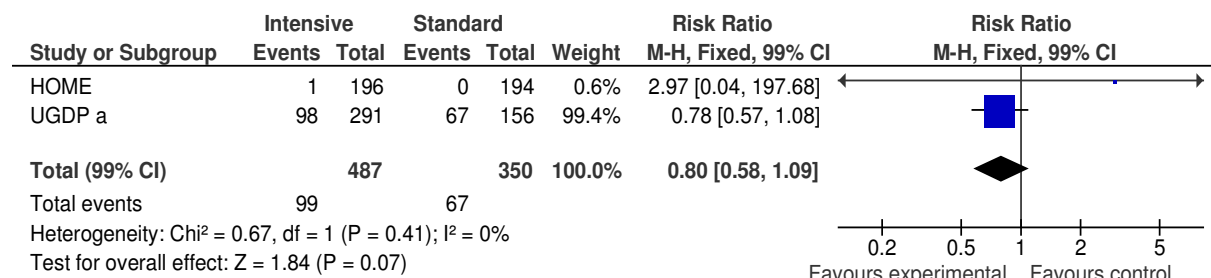

### 2. New or worsening microalbuminuria

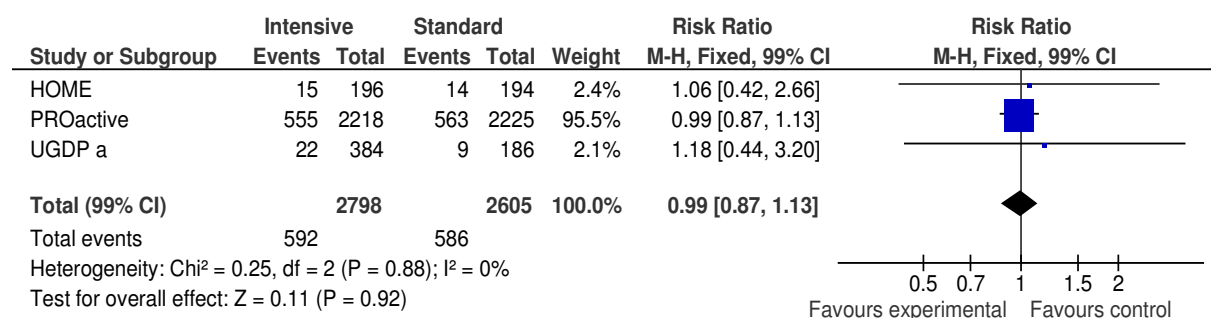

### 3. Fatal or non fatal amputation

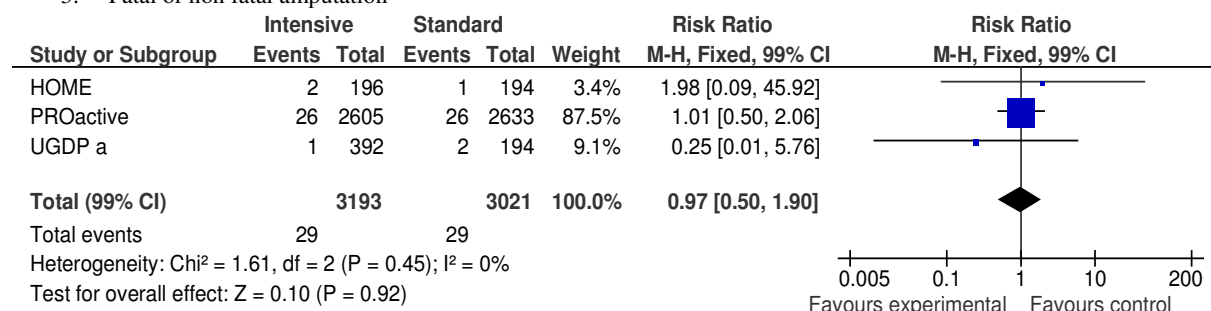

### 4. Peripheral Vascular Events

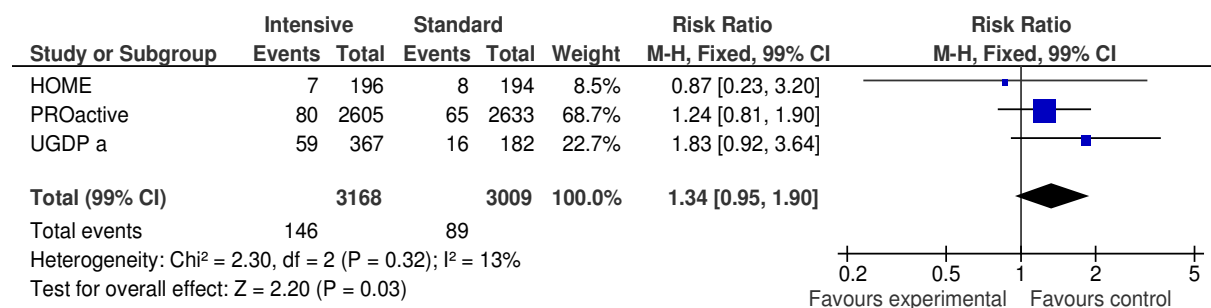

Supplement: bour848580.ww1_default.pdf [file bour848580.ww1_default.pdf]
